# Supplementary material
Source: publisher site journal article supplement (https://www.dovepress.com/article/166277)
Supplement: Supplementary file 1 [file get_supplementary_file.php]

# Care pathways and treatment patterns for patients with heart failure in China: results from a cross-sectional survey

## Supplementary materials

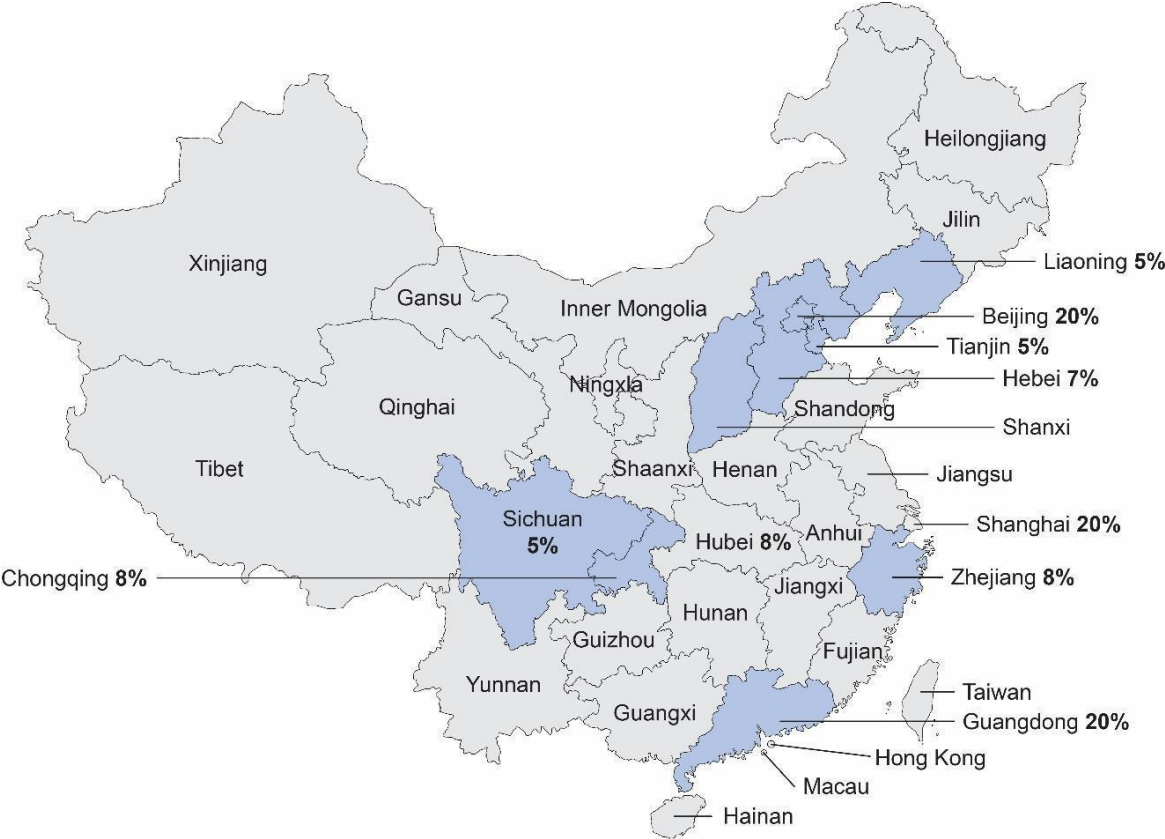

**Figure S1** Regional distribution of cardiologists' practices in China (N=150).  
**Notes:** Data were obtained from physician surveys.

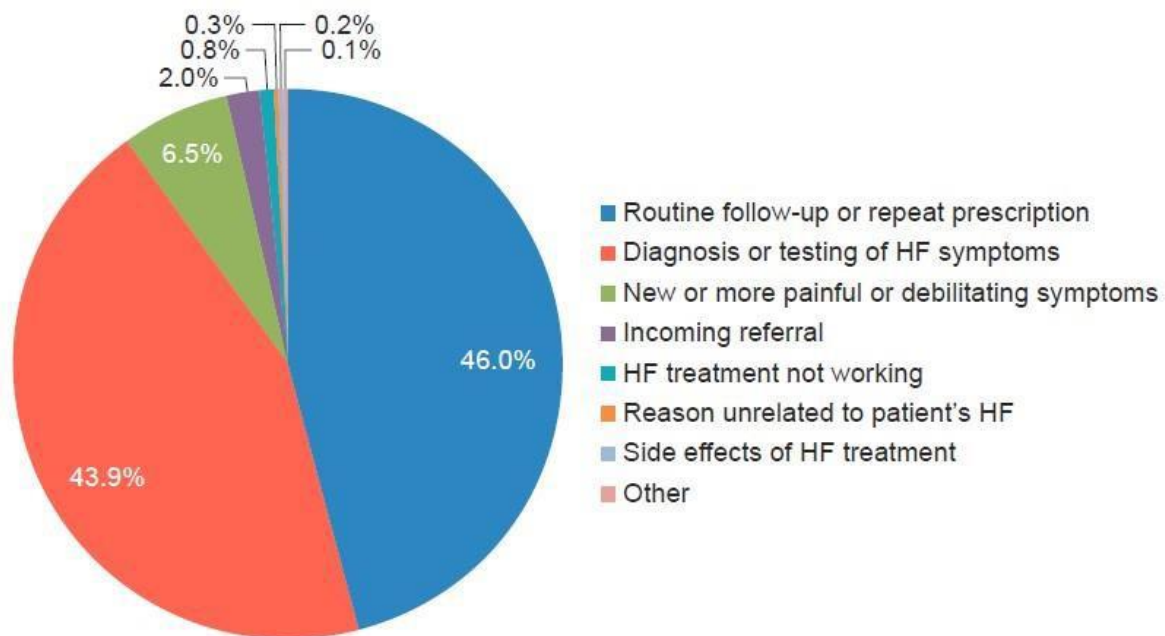

**Figure S2** Reasons for patients' consultation with a cardiologist (N = 1445).

**Notes:** Data obtained from patient record forms.

**Abbreviation:** HF, heart failure.

**Appendix 1**

**Patient Record Form**

**Section A**

Q1. What is the patient's age? \_                      years OR  90+

Q2. What is the patient's sex?  Male  Female

**Section B**

Q2. What is the primary reason for this consultation? *(Please ✓ one)*

|                                                                                                          |                                                                                                 |
|----------------------------------------------------------------------------------------------------------|-------------------------------------------------------------------------------------------------|
| <input type="checkbox"/> Diagnosis and/or testing of heart failure symptoms                              | <input type="checkbox"/> Patient scheduled visit due to side effects from heart failure therapy |
| <input type="checkbox"/> Routine follow-up / for a repeat prescription                                   | <input type="checkbox"/> Incoming referral                                                      |
| <input type="checkbox"/> Patient scheduled visit due to new or more painful and/or debilitating symptoms | <input type="checkbox"/> A reason unrelated to the patient's heart failure condition            |
| <input type="checkbox"/> Patient scheduled visit because heart failure treatment is not working          | <input type="checkbox"/> Other                                                                  |

Q3. What was the time interval between onset of heart failure symptoms and first visit to a physician?

\_\_\_\_\_ weeks OR \_\_\_\_\_ months OR \_\_\_\_\_ years OR  Patient consulted a physician immediately

Q4. What was the time interval between first visit and diagnosis of heart failure?

\_\_\_\_\_ weeks OR \_\_\_\_\_ months OR \_\_\_\_\_ years OR  Diagnosis made at first visit/consultation

Q5. What was the time interval from diagnosis until first prescribed medication to treat heart failure?

\_\_\_\_\_ weeks OR \_\_\_\_\_ months OR \_\_\_\_\_ years OR

Initiated immediately at diagnosis  No prescribed treatment initiated yet

Q8. Please indicate on the grid below the speciality of

|                                                                                                     | Self                     | PCP/GP                   | Internist                | Medical Cardiologist     | Interventional cardiologist | Cardiac Surgeon          | Cardiac Nurse            | Coronary care unit / intensive coronary care unit physician | Cardiac Rehabilitation specialist | Endocrinologist          | Pulmonologist            | Geriatrician             | Other                    |
|-----------------------------------------------------------------------------------------------------|--------------------------|--------------------------|--------------------------|--------------------------|-----------------------------|--------------------------|--------------------------|-------------------------------------------------------------|-----------------------------------|--------------------------|--------------------------|--------------------------|--------------------------|
| a.HCP who the patient first consulted in relation to heart failure                                  | <input type="checkbox"/>    | <input type="checkbox"/> | <input type="checkbox"/> | <input type="checkbox"/>                                    | <input type="checkbox"/>          | <input type="checkbox"/> | <input type="checkbox"/> | <input type="checkbox"/> | <input type="checkbox"/> |
| b.HCP who first confirmed diagnosis of heart failure                                                | <input type="checkbox"/>    | <input type="checkbox"/> | <input type="checkbox"/> | <input type="checkbox"/>                                    | <input type="checkbox"/>          | <input type="checkbox"/> | <input type="checkbox"/> | <input type="checkbox"/> | <input type="checkbox"/> |
| c.HCP who first initiated treatment specifically for heart failure                                  | <input type="checkbox"/>    | <input type="checkbox"/> | <input type="checkbox"/> | <input type="checkbox"/>                                    | <input type="checkbox"/>          | <input type="checkbox"/> | <input type="checkbox"/> | <input type="checkbox"/> | <input type="checkbox"/> |
| d.Other HCPs who have been involved in treating the patient's heart failure                         | <input type="checkbox"/>    | <input type="checkbox"/> | <input type="checkbox"/> | <input type="checkbox"/>                                    | <input type="checkbox"/>          | <input type="checkbox"/> | <input type="checkbox"/> | <input type="checkbox"/> | <input type="checkbox"/> |
| e.Number of times patient has consulted each HCP in relation to heart failure in the last 12 months | <input type="checkbox"/>    | <input type="checkbox"/> | <input type="checkbox"/> | <input type="checkbox"/>                                    | <input type="checkbox"/>          | <input type="checkbox"/> | <input type="checkbox"/> | <input type="checkbox"/> | <input type="checkbox"/> |

### Section C

Q3b. What is this patient's Ejection Fraction level . Currently \_\_\_\_\_ At diagnosis \_\_\_\_\_ 12 months ago ?

Q4. What is this patient's current NYHA functional classification and what was it 12 months ago (if applicable)

|                                                                                                                                       | Currently                | 12 months ago            |
|---------------------------------------------------------------------------------------------------------------------------------------|--------------------------|--------------------------|
| (I) No limitation of physical activity. Ordinary physical activity does not cause symptoms of heart failure                           | <input type="checkbox"/> | <input type="checkbox"/> |
| (II) Slight limitation of physical activity. Comfortable at rest, but ordinary physical activity results in symptoms of heart failure | <input type="checkbox"/> | <input type="checkbox"/> |
| (III) Marked limitation of physical activity. Comfortable at rest, but less than ordinary activity causes symptoms of heart failure   | <input type="checkbox"/> | <input type="checkbox"/> |
| (IV) Unable to carry on any physical activity without symptoms of heart failure, or symptoms of heart failure at rest                 | <input type="checkbox"/> | <input type="checkbox"/> |

Q5. What is the underlying cause of this patient's heart failure? (please ✓ all that apply)

|                                                                         |                                                  |                                                             |
|-------------------------------------------------------------------------|--------------------------------------------------|-------------------------------------------------------------|
| <input type="checkbox"/> Idiopathic                                     | <input type="checkbox"/> Valve disease/problems  | <input type="checkbox"/> Hypothyroidism                     |
| <input type="checkbox"/> Genetic / familial                             | <input type="checkbox"/> Congenital heart defect | <input type="checkbox"/> Chronic kidney disease             |
| <input type="checkbox"/> Coronary Heart Disease / Myocardial infarction | <input type="checkbox"/> Atrial Fibrillation     | <input type="checkbox"/> Alcohol/drug abuse                 |
| <input type="checkbox"/> Chronic obstructive pulmonary disease          | <input type="checkbox"/> Arrhythmia              | <input type="checkbox"/> Smoking                            |
| <input type="checkbox"/> Hypertension                                   | <input type="checkbox"/> Venous thromboembolism  | <input type="checkbox"/> Obesity                            |
| <input type="checkbox"/> Cardiomyopathy                                 | <input type="checkbox"/> High cholesterol        | <input type="checkbox"/> Chagas disease                     |
| <input type="checkbox"/> Myocarditis                                    | <input type="checkbox"/> Diabetes                | <input type="checkbox"/> I do not know the underlying cause |
| <input type="checkbox"/> Cardiac amyloidosis                            | <input type="checkbox"/> Hyperthyroidism         | <input type="checkbox"/> Other (specify) _____              |

## **Section F**

Q1a. Which of the following examinations/tests/scans were conducted for this patient (by any physician) to aid their heart failure diagnosis

Q1b. Which of the following examinations/tests/scans were conducted for this patient (by any physician) in order to monitor their heart failure

Q1c. How many times each examination/test/scan has been conducted/used in the last 12 months in relation to the patient's heart failure

Q1d-f. Please also provide the results for the examinations/tests/scans at the time points indicated (please ✓ one unit per test)

### Physical Examinations

|                                                 | a) <u>Diagnose</u> this patient's heart failure | b) <u>Monitor</u> this patients heart failure | c) Number of times tested in the last 12 months | d) Current Value / sign currently present                            | e) Value at diagnosis / sign present at diagnosis                    | f) Value 12 months ago / sign present 12 months ago                  |
|-------------------------------------------------|-------------------------------------------------|-----------------------------------------------|-------------------------------------------------|----------------------------------------------------------------------|----------------------------------------------------------------------|----------------------------------------------------------------------|
| 1. Blood pressure (SYS/DIA)                     | <input type="checkbox"/>                        | <input type="checkbox"/>                      | _____                                           | ____/____ mmHg                                                       | ____/____ mmHg                                                       | ____/____ mmHg                                                       |
| 2. Heart rate                                   | <input type="checkbox"/>                        | <input type="checkbox"/>                      | _____                                           | _____ bpm                                                            | _____ bpm                                                            | _____ bpm                                                            |
| 3. Exercise test                                | <input type="checkbox"/>                        | <input type="checkbox"/>                      | _____                                           | <input type="checkbox"/> Normal<br><input type="checkbox"/> Abnormal | <input type="checkbox"/> Normal<br><input type="checkbox"/> Abnormal | <input type="checkbox"/> Normal<br><input type="checkbox"/> Abnormal |
| 4. FEV1 (spirometry)                            | <input type="checkbox"/>                        | <input type="checkbox"/>                      | _____                                           | _____ %                                                              | _____ %                                                              | _____ %                                                              |
| 5. PEFR (peak flow)                             | <input type="checkbox"/>                        | <input type="checkbox"/>                      | _____                                           | _____ %                                                              | _____ %                                                              | _____ %                                                              |
| 6. Pulmonary crackles                           | <input type="checkbox"/>                        | <input type="checkbox"/>                      | _____                                           | <input type="checkbox"/> Yes <input type="checkbox"/> No             | <input type="checkbox"/> Yes <input type="checkbox"/> No             | <input type="checkbox"/> Yes <input type="checkbox"/> No             |
| 7. Jugular Venous Pressure (JVP)                | <input type="checkbox"/>                        | <input type="checkbox"/>                      | _____                                           | _____ cm H <sub>2</sub> O                                            | _____ cm H <sub>2</sub> O                                            | _____ cm H <sub>2</sub> O                                            |
| 8. Signs of poor circulation / cold extremities | <input type="checkbox"/>                        | <input type="checkbox"/>                      | _____                                           | <input type="checkbox"/> Yes <input type="checkbox"/> No             | <input type="checkbox"/> Yes <input type="checkbox"/> No             | <input type="checkbox"/> Yes <input type="checkbox"/> No             |
| 9. Pleural effusion                             | <input type="checkbox"/>                        | <input type="checkbox"/>                      | _____                                           | <input type="checkbox"/> Yes <input type="checkbox"/> No             | <input type="checkbox"/> Yes <input type="checkbox"/> No             | <input type="checkbox"/> Yes <input type="checkbox"/> No             |
| 10. S3 gallop / cardiac murmur                  | <input type="checkbox"/>                        | <input type="checkbox"/>                      | _____                                           | <input type="checkbox"/> Yes <input type="checkbox"/> No             | <input type="checkbox"/> Yes <input type="checkbox"/> No             | <input type="checkbox"/> Yes <input type="checkbox"/> No             |
| 11. Peripheral hypoperfusion                    | <input type="checkbox"/>                        | <input type="checkbox"/>                      | _____                                           | <input type="checkbox"/> Yes <input type="checkbox"/> No             | <input type="checkbox"/> Yes <input type="checkbox"/> No             | <input type="checkbox"/> Yes <input type="checkbox"/> No             |
| 12. Mitral regurgitation                        | <input type="checkbox"/>                        | <input type="checkbox"/>                      | _____                                           | <input type="checkbox"/> Yes <input type="checkbox"/> No             | <input type="checkbox"/> Yes <input type="checkbox"/> No             | <input type="checkbox"/> Yes <input type="checkbox"/> No             |
| 13. Aortic stenosis                             | <input type="checkbox"/>                        | <input type="checkbox"/>                      | _____                                           | <input type="checkbox"/> Yes <input type="checkbox"/> No             | <input type="checkbox"/> Yes <input type="checkbox"/> No             | <input type="checkbox"/> Yes <input type="checkbox"/> No             |
| 14. Peripheral oedema                           | <input type="checkbox"/>                        | <input type="checkbox"/>                      | _____                                           | <input type="checkbox"/> Yes <input type="checkbox"/> No             | <input type="checkbox"/> Yes <input type="checkbox"/> No             | <input type="checkbox"/> Yes <input type="checkbox"/> No             |
| 15. Family history                              | <input type="checkbox"/>                        |                                               |                                                 |                                                                      |                                                                      |                                                                      |
| 16. Cognitive status                            | <input type="checkbox"/>                        | <input type="checkbox"/>                      | _____                                           |                                                                      |                                                                      |                                                                      |
| 17. Other _____                                 | <input type="checkbox"/>                        | <input type="checkbox"/>                      | _____                                           | _____                                                                | _____                                                                | _____                                                                |

### Blood/Urine Tests

|                                                               | a) <u>Diagnose</u> this patient's heart failure | b) <u>Monitor</u> this patients heart failure | c) Number of times tested in the last 12 months | d) Current Value (please ✓ a unit)                                                                                           | e) Value at diagnosis (please ✓ a unit)                                                                                      | f) Value 12 months ago (please ✓ a unit)                                                                                     |
|---------------------------------------------------------------|-------------------------------------------------|-----------------------------------------------|-------------------------------------------------|------------------------------------------------------------------------------------------------------------------------------|------------------------------------------------------------------------------------------------------------------------------|------------------------------------------------------------------------------------------------------------------------------|
| 1. B-type natriuretic peptide (BNP)                           | <input type="checkbox"/>                        | <input type="checkbox"/>                      | _____                                           | <input type="checkbox"/> pg/mL <input type="checkbox"/> ng/L<br><input type="checkbox"/> pmol/L                              | <input type="checkbox"/> pg/mL <input type="checkbox"/> ng/L<br><input type="checkbox"/> pmol/L                              | <input type="checkbox"/> pg/mL <input type="checkbox"/> ng/L<br><input type="checkbox"/> pmol/L                              |
| 2. N terminal fragment B-type natriuretic peptide (NT-proBNP) | <input type="checkbox"/>                        | <input type="checkbox"/>                      | _____                                           | <input type="checkbox"/> pg/mL <input type="checkbox"/> ng/L<br><input type="checkbox"/> pmol/L                              | <input type="checkbox"/> pg/mL <input type="checkbox"/> ng/L<br><input type="checkbox"/> pmol/L                              | <input type="checkbox"/> pg/mL <input type="checkbox"/> ng/L<br><input type="checkbox"/> pmol/L                              |
| 3. Troponin I or T                                            | <input type="checkbox"/>                        | <input type="checkbox"/>                      | _____                                           | <input type="checkbox"/> ng/mL <input type="checkbox"/> pg/mL<br><input type="checkbox"/> ng/L <input type="checkbox"/> µg/L | <input type="checkbox"/> ng/mL <input type="checkbox"/> pg/mL<br><input type="checkbox"/> ng/L <input type="checkbox"/> µg/L | <input type="checkbox"/> ng/mL <input type="checkbox"/> pg/mL<br><input type="checkbox"/> ng/L <input type="checkbox"/> µg/L |
| 4. Hs-Troponin I or T                                         | <input type="checkbox"/>                        | <input type="checkbox"/>                      | _____                                           | <input type="checkbox"/> ng/mL <input type="checkbox"/> pg/mL<br><input type="checkbox"/> ng/L <input type="checkbox"/> µg/L | <input type="checkbox"/> ng/mL <input type="checkbox"/> pg/mL<br><input type="checkbox"/> ng/L <input type="checkbox"/> µg/L | <input type="checkbox"/> ng/mL <input type="checkbox"/> pg/mL<br><input type="checkbox"/> ng/L <input type="checkbox"/> µg/L |
| 5. Total Creatinine Kinase (CK-MB)                            | <input type="checkbox"/>                        | <input type="checkbox"/>                      | _____                                           | _____ Units/L                                                                                                                | _____ Units/L                                                                                                                | _____ Units/L                                                                                                                |

|                                                 | a) <u>Diagnose</u> this patient's heart failure | b) <u>Monitor</u> this patient's heart failure | c) Number of times tested in the last 12 months | d) Current Value (please ✓ a unit)                                                                             | e) Value at diagnosis (please ✓ a unit)                                                                        | f) Value 12 months ago (please ✓ a unit)                                                                       |
|-------------------------------------------------|-------------------------------------------------|------------------------------------------------|-------------------------------------------------|----------------------------------------------------------------------------------------------------------------|----------------------------------------------------------------------------------------------------------------|----------------------------------------------------------------------------------------------------------------|
| 6. Serum AST<br>Aspartate aminotransferase      | <input type="checkbox"/>                        | <input type="checkbox"/>                       | _____                                           | _____<br><input type="checkbox"/> IU/L <input type="checkbox"/> mckat/L                                        | _____<br><input type="checkbox"/> IU/L <input type="checkbox"/> mckat/L                                        | _____<br><input type="checkbox"/> IU/L <input type="checkbox"/> mckat/L                                        |
| 7. Serum ALT<br>Alanine aminotransferase        | <input type="checkbox"/>                        | <input type="checkbox"/>                       | _____                                           | _____<br><input type="checkbox"/> IU/L <input type="checkbox"/> mckat/L                                        | _____<br><input type="checkbox"/> IU/L <input type="checkbox"/> mckat/L                                        | _____<br><input type="checkbox"/> IU/L <input type="checkbox"/> mckat/L                                        |
| 8. Triglycerides                                | <input type="checkbox"/>                        | <input type="checkbox"/>                       | _____                                           | _____<br><input type="checkbox"/> mg/dl <input type="checkbox"/> g/L<br><input type="checkbox"/> mmol/L        | _____<br><input type="checkbox"/> mg/dl <input type="checkbox"/> g/L<br><input type="checkbox"/> mmol/L        | _____<br><input type="checkbox"/> mg/dl <input type="checkbox"/> g/L<br><input type="checkbox"/> mmol/L        |
| 9. Fasting glucose                              | <input type="checkbox"/>                        | <input type="checkbox"/>                       | _____                                           | _____<br><input type="checkbox"/> mg/dl <input type="checkbox"/> g/L<br><input type="checkbox"/> mmol/L        | _____<br><input type="checkbox"/> mg/dl <input type="checkbox"/> g/L<br><input type="checkbox"/> mmol/L        | _____<br><input type="checkbox"/> mg/dl <input type="checkbox"/> g/L<br><input type="checkbox"/> mmol/L        |
| 10. HbA1c                                       | <input type="checkbox"/>                        | <input type="checkbox"/>                       | _____                                           | _____<br><input type="checkbox"/> %<br><input type="checkbox"/> mmol/mol                                       | _____<br><input type="checkbox"/> %<br><input type="checkbox"/> mmol/mol                                       | _____<br><input type="checkbox"/> %<br><input type="checkbox"/> mmol/mol                                       |
| 11. Estimated Glomerular Filtration Rate (eGFR) | <input type="checkbox"/>                        | <input type="checkbox"/>                       | _____                                           | _____<br>mL/min/1.73m <sup>2</sup>                                                                             | _____<br>mL/min/1.73m <sup>2</sup>                                                                             | _____<br>mL/min/1.73m <sup>2</sup>                                                                             |
| 12. Urine Albumin Creatinine Ratio (ACR)        | <input type="checkbox"/>                        | <input type="checkbox"/>                       | _____                                           | _____<br><input type="checkbox"/> mg/mmol<br><input type="checkbox"/> mg/g<br><input type="checkbox"/> mg/24hr | _____<br><input type="checkbox"/> mg/mmol<br><input type="checkbox"/> mg/g<br><input type="checkbox"/> mg/24hr | _____<br><input type="checkbox"/> mg/mmol<br><input type="checkbox"/> mg/g<br><input type="checkbox"/> mg/24hr |
| 13. Urine Protein Creatinine Ratio (PCR)        | <input type="checkbox"/>                        | <input type="checkbox"/>                       | _____                                           | _____<br><input type="checkbox"/> mg/mmol<br><input type="checkbox"/> mg/g<br><input type="checkbox"/> mg/24hr | _____<br><input type="checkbox"/> mg/mmol<br><input type="checkbox"/> mg/g<br><input type="checkbox"/> mg/24hr | _____<br><input type="checkbox"/> mg/mmol<br><input type="checkbox"/> mg/g<br><input type="checkbox"/> mg/24hr |
| 14. Serum creatinine                            | <input type="checkbox"/>                        | <input type="checkbox"/>                       | _____                                           | _____<br><input type="checkbox"/> mg/dl <input type="checkbox"/> g/L<br><input type="checkbox"/> µmol/L        | _____<br><input type="checkbox"/> mg/dl <input type="checkbox"/> g/L<br><input type="checkbox"/> µmol/L        | _____<br><input type="checkbox"/> mg/dl <input type="checkbox"/> g/L<br><input type="checkbox"/> µmol/L        |
| 15. Serum potassium                             | <input type="checkbox"/>                        | <input type="checkbox"/>                       | _____                                           | _____<br><input type="checkbox"/> mEq/L <input type="checkbox"/> g/L<br><input type="checkbox"/> mmol/L        | _____<br><input type="checkbox"/> mEq/L <input type="checkbox"/> g/L<br><input type="checkbox"/> mmol/L        | _____<br><input type="checkbox"/> mEq/L <input type="checkbox"/> g/L<br><input type="checkbox"/> mmol/L        |
| 16. Sodium                                      | <input type="checkbox"/>                        | <input type="checkbox"/>                       | _____                                           | _____<br><input type="checkbox"/> mEq/L <input type="checkbox"/> g/L<br><input type="checkbox"/> mmol/L        | _____<br><input type="checkbox"/> mEq/L <input type="checkbox"/> g/L<br><input type="checkbox"/> mmol/L        | _____<br><input type="checkbox"/> mEq/L <input type="checkbox"/> g/L<br><input type="checkbox"/> mmol/L        |
| 17. Calcium                                     | <input type="checkbox"/>                        | <input type="checkbox"/>                       | _____                                           | _____<br><input type="checkbox"/> mg/dl <input type="checkbox"/> g/L<br><input type="checkbox"/> mmol/L        | _____<br><input type="checkbox"/> mg/dl <input type="checkbox"/> g/L<br><input type="checkbox"/> mmol/L        | _____<br><input type="checkbox"/> mg/dl <input type="checkbox"/> g/L<br><input type="checkbox"/> mmol/L        |
| 18. Thyroid Function                            | <input type="checkbox"/>                        | <input type="checkbox"/>                       | _____                                           | <input type="checkbox"/> Normal<br><input type="checkbox"/> Abnormal                                           | <input type="checkbox"/> Normal<br><input type="checkbox"/> Abnormal                                           | <input type="checkbox"/> Normal<br><input type="checkbox"/> Abnormal                                           |
| 19. Haemoglobin                                 | <input type="checkbox"/>                        | <input type="checkbox"/>                       | _____                                           | _____<br><input type="checkbox"/> g/dL <input type="checkbox"/> g/L<br><input type="checkbox"/> mmol/L         | _____<br><input type="checkbox"/> g/dL <input type="checkbox"/> g/L<br><input type="checkbox"/> mmol/L         | _____<br><input type="checkbox"/> g/dL <input type="checkbox"/> g/L<br><input type="checkbox"/> mmol/L         |
| 20. Total cholesterol                           | <input type="checkbox"/>                        | <input type="checkbox"/>                       | _____                                           | _____<br><input type="checkbox"/> mg/dl <input type="checkbox"/> g/L<br><input type="checkbox"/> mmol/L        | _____<br><input type="checkbox"/> mg/dl <input type="checkbox"/> g/L<br><input type="checkbox"/> mmol/L        | _____<br><input type="checkbox"/> mg/dl <input type="checkbox"/> g/L<br><input type="checkbox"/> mmol/L        |
| 21. LDL-C                                       | <input type="checkbox"/>                        | <input type="checkbox"/>                       | _____                                           | _____<br><input type="checkbox"/> mg/dl <input type="checkbox"/> g/L<br><input type="checkbox"/> mmol/L        | _____<br><input type="checkbox"/> mg/dl <input type="checkbox"/> g/L<br><input type="checkbox"/> mmol/L        | _____<br><input type="checkbox"/> mg/dl <input type="checkbox"/> g/L<br><input type="checkbox"/> mmol/L        |
| 22. HDL-C                                       | <input type="checkbox"/>                        | <input type="checkbox"/>                       | _____                                           | _____<br><input type="checkbox"/> mg/dl <input type="checkbox"/> g/L<br><input type="checkbox"/> mmol/L        | _____<br><input type="checkbox"/> mg/dl <input type="checkbox"/> g/L<br><input type="checkbox"/> mmol/L        | _____<br><input type="checkbox"/> mg/dl <input type="checkbox"/> g/L<br><input type="checkbox"/> mmol/L        |

|                                                   | a) <u>Diagnose</u> this patient's heart failure | b) <u>Monitor</u> this patients heart failure | c) Number of times tested in the <u>last 12 months</u> | d) Current Value (please ✓ a unit)                                                                                                                                      | e) Value at diagnosis (please ✓ a unit)                                                                                                                                 | f) Value 12 months ago (please ✓ a unit)                                                                                                                                |
|---------------------------------------------------|-------------------------------------------------|-----------------------------------------------|--------------------------------------------------------|-------------------------------------------------------------------------------------------------------------------------------------------------------------------------|-------------------------------------------------------------------------------------------------------------------------------------------------------------------------|-------------------------------------------------------------------------------------------------------------------------------------------------------------------------|
| 23. Highly sensitive C-reactive protein (Hs -CRP) | <input type="checkbox"/>                        | <input type="checkbox"/>                      | _____                                                  | <input type="checkbox"/> mg/L <input type="checkbox"/> mg/dl<br><input type="checkbox"/> nmol/L                                                                         | <input type="checkbox"/> mg/L <input type="checkbox"/> mg/dl<br><input type="checkbox"/> nmol/L                                                                         | <input type="checkbox"/> mg/L <input type="checkbox"/> mg/dl<br><input type="checkbox"/> nmol/L                                                                         |
| 24. Blood urea nitrogen (BUN)                     | <input type="checkbox"/>                        | <input type="checkbox"/>                      | _____                                                  | <input type="checkbox"/> mg/dl <input type="checkbox"/> g/L<br><input type="checkbox"/> mmol/L                                                                          | <input type="checkbox"/> mg/dl <input type="checkbox"/> g/L<br><input type="checkbox"/> mmol/L                                                                          | <input type="checkbox"/> mg/dl <input type="checkbox"/> g/L<br><input type="checkbox"/> mmol/L                                                                          |
| 25. Urea nitrogen                                 | <input type="checkbox"/>                        | <input type="checkbox"/>                      | _____                                                  | <input type="checkbox"/> mg/dl <input type="checkbox"/> g/L<br><input type="checkbox"/> mmol/L                                                                          | <input type="checkbox"/> mg/dl <input type="checkbox"/> g/L<br><input type="checkbox"/> mmol/L                                                                          | <input type="checkbox"/> mg/dl <input type="checkbox"/> g/L<br><input type="checkbox"/> mmol/L                                                                          |
| 26. Platelet count                                | <input type="checkbox"/>                        | <input type="checkbox"/>                      | _____                                                  | <input type="checkbox"/> / $\mu$ L <input type="checkbox"/> $\times 10^4$ / $\mu$ L<br><input type="checkbox"/> $\text{mm}^3$ <input type="checkbox"/> $\times 10^9$ /L | <input type="checkbox"/> / $\mu$ L <input type="checkbox"/> $\times 10^4$ / $\mu$ L<br><input type="checkbox"/> $\text{mm}^3$ <input type="checkbox"/> $\times 10^9$ /L | <input type="checkbox"/> / $\mu$ L <input type="checkbox"/> $\times 10^4$ / $\mu$ L<br><input type="checkbox"/> $\text{mm}^3$ <input type="checkbox"/> $\times 10^9$ /L |
| 27. Uric acid                                     | <input type="checkbox"/>                        | <input type="checkbox"/>                      | _____                                                  | <input type="checkbox"/> mg/dL<br><input type="checkbox"/> $\mu$ mol/L                                                                                                  | <input type="checkbox"/> mg/dL<br><input type="checkbox"/> $\mu$ mol/L                                                                                                  | <input type="checkbox"/> mg/dL<br><input type="checkbox"/> $\mu$ mol/L                                                                                                  |
| 28. Other _____                                   | <input type="checkbox"/>                        | <input type="checkbox"/>                      | _____                                                  | _____                                                                                                                                                                   | _____                                                                                                                                                                   | _____                                                                                                                                                                   |

### Scans / Investigations

|                                   | a) <u>Diagnose</u> this patient's heart failure | b) <u>Monitor</u> this patients heart failure | c) Number of times tested in the <u>last 12 months</u> | d) Current Value                                                     | e) Value at diagnosis                                                | f) Value 12 months ago                                               |
|-----------------------------------|-------------------------------------------------|-----------------------------------------------|--------------------------------------------------------|----------------------------------------------------------------------|----------------------------------------------------------------------|----------------------------------------------------------------------|
| 1. <b>Echocardiogram</b>          | <input type="checkbox"/>                        | <input type="checkbox"/>                      | _____                                                  | <input type="checkbox"/> Normal<br><input type="checkbox"/> Abnormal | <input type="checkbox"/> Normal<br><input type="checkbox"/> Abnormal | <input type="checkbox"/> Normal<br><input type="checkbox"/> Abnormal |
| 2. <b>Ejection Fraction</b>       | <input type="checkbox"/>                        | <input type="checkbox"/>                      | _____                                                  |                                                                      |                                                                      |                                                                      |
| 3. <b>Electrocardiogram (ECG)</b> | <input type="checkbox"/>                        | <input type="checkbox"/>                      | _____                                                  | <input type="checkbox"/> Normal<br><input type="checkbox"/> Abnormal | <input type="checkbox"/> Normal<br><input type="checkbox"/> Abnormal | <input type="checkbox"/> Normal<br><input type="checkbox"/> Abnormal |
| 4. QRS-duration                   | <input type="checkbox"/>                        | <input type="checkbox"/>                      | _____                                                  | _____ ms                                                             | _____ ms                                                             | _____ ms                                                             |
| 5. QT- interval                   | <input type="checkbox"/>                        | <input type="checkbox"/>                      | _____                                                  | _____ ms                                                             | _____ ms                                                             | _____ ms                                                             |
| 6. <b>Holter monitoring</b>       | <input type="checkbox"/>                        | <input type="checkbox"/>                      | _____                                                  | <input type="checkbox"/> Normal<br><input type="checkbox"/> Abnormal | <input type="checkbox"/> Normal<br><input type="checkbox"/> Abnormal | <input type="checkbox"/> Normal<br><input type="checkbox"/> Abnormal |
| 7. <b>Chest X-ray</b>             | <input type="checkbox"/>                        | <input type="checkbox"/>                      | _____                                                  | <input type="checkbox"/> Normal<br><input type="checkbox"/> Abnormal | <input type="checkbox"/> Normal<br><input type="checkbox"/> Abnormal | <input type="checkbox"/> Normal<br><input type="checkbox"/> Abnormal |
| 8. <b>Coronary Angiogram</b>      | <input type="checkbox"/>                        | <input type="checkbox"/>                      | _____                                                  | <input type="checkbox"/> Normal<br><input type="checkbox"/> Abnormal | <input type="checkbox"/> Normal<br><input type="checkbox"/> Abnormal | <input type="checkbox"/> Normal<br><input type="checkbox"/> Abnormal |
| 9. <b>Cardiac CT scan</b>         | <input type="checkbox"/>                        | <input type="checkbox"/>                      | _____                                                  | <input type="checkbox"/> Normal<br><input type="checkbox"/> Abnormal | <input type="checkbox"/> Normal<br><input type="checkbox"/> Abnormal | <input type="checkbox"/> Normal<br><input type="checkbox"/> Abnormal |
| 10. <b>Cardiac MRI</b>            | <input type="checkbox"/>                        | <input type="checkbox"/>                      | _____                                                  | <input type="checkbox"/> Normal<br><input type="checkbox"/> Abnormal | <input type="checkbox"/> Normal<br><input type="checkbox"/> Abnormal | <input type="checkbox"/> Normal<br><input type="checkbox"/> Abnormal |
| 11. Cardiac catheterization       | <input type="checkbox"/>                        | <input type="checkbox"/>                      | _____                                                  | <input type="checkbox"/> Normal<br><input type="checkbox"/> Abnormal | <input type="checkbox"/> Normal<br><input type="checkbox"/> Abnormal | <input type="checkbox"/> Normal<br><input type="checkbox"/> Abnormal |
| 12. Nuclear medicine scan         | <input type="checkbox"/>                        | <input type="checkbox"/>                      | _____                                                  | <input type="checkbox"/> Normal<br><input type="checkbox"/> Abnormal | <input type="checkbox"/> Normal<br><input type="checkbox"/> Abnormal | <input type="checkbox"/> Normal<br><input type="checkbox"/> Abnormal |
| 13. Radionuclide (Isotope) Scan   | <input type="checkbox"/>                        | <input type="checkbox"/>                      | _____                                                  | <input type="checkbox"/> Normal<br><input type="checkbox"/> Abnormal | <input type="checkbox"/> Normal<br><input type="checkbox"/> Abnormal | <input type="checkbox"/> Normal<br><input type="checkbox"/> Abnormal |
| 14. Myocardial scintigraphy       | <input type="checkbox"/>                        | <input type="checkbox"/>                      | _____                                                  | <input type="checkbox"/> Normal<br><input type="checkbox"/> Abnormal | <input type="checkbox"/> Normal<br><input type="checkbox"/> Abnormal | <input type="checkbox"/> Normal<br><input type="checkbox"/> Abnormal |
| 15. Other _____                   | <input type="checkbox"/>                        | <input type="checkbox"/>                      | _____                                                  | _____                                                                | _____                                                                | _____                                                                |



# Section I

Please record all current heart failure therapies, dose per tablet / injection (including unit), frequency, whether it was the patient’s initial regimen and duration of treatment. Then work back through any previous regimens recording drug information for each. Please do not include dose change as a change in regimen.

| 1) |                                                   | Current Regimen          |                          |                             |                          |                          |                          |                          | Previous Regimen 1       | Previous Regimen 2       | Previous Regimen 3 |
|----|---------------------------------------------------|--------------------------|--------------------------|-----------------------------|--------------------------|--------------------------|--------------------------|--------------------------|--------------------------|--------------------------|--------------------|
|    | <input type="checkbox"/> <input type="checkbox"/> | <input type="checkbox"/> | <input type="checkbox"/> | <input type="checkbox"/>    | <input type="checkbox"/> | <input type="checkbox"/> | <input type="checkbox"/> | <input type="checkbox"/> | <input type="checkbox"/> | <input type="checkbox"/> |                    |
|    | <input type="checkbox"/>                          | <input type="checkbox"/> | <input type="checkbox"/> | <input type="checkbox"/>    | <input type="checkbox"/> | <input type="checkbox"/> | <input type="checkbox"/> | <input type="checkbox"/> | <input type="checkbox"/> | <input type="checkbox"/> |                    |
|    | <input type="checkbox"/>                          | <input type="checkbox"/> | <input type="checkbox"/> | <input type="checkbox"/>    | <input type="checkbox"/> | <input type="checkbox"/> | <input type="checkbox"/> | <input type="checkbox"/> | <input type="checkbox"/> | <input type="checkbox"/> |                    |
|    | <input type="checkbox"/>                          | <input type="checkbox"/> | <input type="checkbox"/> | <input type="checkbox"/>    | <input type="checkbox"/> | <input type="checkbox"/> | <input type="checkbox"/> | <input type="checkbox"/> | <input type="checkbox"/> | <input type="checkbox"/> |                    |
|    | <input type="checkbox"/>                          | <input type="checkbox"/> | <input type="checkbox"/> | <input type="checkbox"/>    | <input type="checkbox"/> | <input type="checkbox"/> | <input type="checkbox"/> | <input type="checkbox"/> | <input type="checkbox"/> | <input type="checkbox"/> |                    |
|    | <input type="checkbox"/>                          | <input type="checkbox"/> | <input type="checkbox"/> | <input type="checkbox"/>    | <input type="checkbox"/> | <input type="checkbox"/> | <input type="checkbox"/> | <input type="checkbox"/> | <input type="checkbox"/> | <input type="checkbox"/> |                    |
|    | <input type="checkbox"/>                          | <input type="checkbox"/> | <input type="checkbox"/> | <input type="checkbox"/>    | <input type="checkbox"/> | <input type="checkbox"/> | <input type="checkbox"/> | <input type="checkbox"/> | <input type="checkbox"/> | <input type="checkbox"/> |                    |
|    | <input type="checkbox"/>                          | <input type="checkbox"/> | <input type="checkbox"/> | <input type="checkbox"/>    | <input type="checkbox"/> | <input type="checkbox"/> | <input type="checkbox"/> | <input type="checkbox"/> | <input type="checkbox"/> | <input type="checkbox"/> |                    |
|    | <input type="checkbox"/>                          | <input type="checkbox"/> | <input type="checkbox"/> | <input type="checkbox"/>    | <input type="checkbox"/> | <input type="checkbox"/> | <input type="checkbox"/> | <input type="checkbox"/> | <input type="checkbox"/> | <input type="checkbox"/> |                    |
|    | <input type="checkbox"/>                          | <input type="checkbox"/> | <input type="checkbox"/> | <input type="checkbox"/>    | <input type="checkbox"/> | <input type="checkbox"/> | <input type="checkbox"/> | <input type="checkbox"/> | <input type="checkbox"/> | <input type="checkbox"/> |                    |
|    | <input type="checkbox"/>                          | <input type="checkbox"/> | <input type="checkbox"/> | <input type="checkbox"/>    | <input type="checkbox"/> | <input type="checkbox"/> | <input type="checkbox"/> | <input type="checkbox"/> | <input type="checkbox"/> | <input type="checkbox"/> |                    |
|    | <input type="checkbox"/>                          | <input type="checkbox"/> | <input type="checkbox"/> | <input type="checkbox"/>    | <input type="checkbox"/> | <input type="checkbox"/> | <input type="checkbox"/> | <input type="checkbox"/> | <input type="checkbox"/> | <input type="checkbox"/> |                    |
|    | <input type="checkbox"/>                          | <input type="checkbox"/> | <input type="checkbox"/> | <input type="checkbox"/>    | <input type="checkbox"/> | <input type="checkbox"/> | <input type="checkbox"/> | <input type="checkbox"/> | <input type="checkbox"/> | <input type="checkbox"/> |                    |
|    | <input type="checkbox"/>                          | <input type="checkbox"/> | <input type="checkbox"/> | <input type="checkbox"/>    | <input type="checkbox"/> | <input type="checkbox"/> | <input type="checkbox"/> | <input type="checkbox"/> | <input type="checkbox"/> | <input type="checkbox"/> |                    |
|    | <input type="checkbox"/>                          | <input type="checkbox"/> | <input type="checkbox"/> | <input type="checkbox"/>    | <input type="checkbox"/> | <input type="checkbox"/> | <input type="checkbox"/> | <input type="checkbox"/> | <input type="checkbox"/> | <input type="checkbox"/> |                    |
|    | <input type="checkbox"/>                          | <input type="checkbox"/> | <input type="checkbox"/> | <input type="checkbox"/>    | <input type="checkbox"/> | <input type="checkbox"/> | <input type="checkbox"/> | <input type="checkbox"/> | <input type="checkbox"/> | <input type="checkbox"/> |                    |
|    | <input type="checkbox"/>                          | <input type="checkbox"/> | <input type="checkbox"/> | <input type="checkbox"/>    | <input type="checkbox"/> | <input type="checkbox"/> | <input type="checkbox"/> | <input type="checkbox"/> | <input type="checkbox"/> | <input type="checkbox"/> |                    |
|    | <input type="checkbox"/>                          | <input type="checkbox"/> | <input type="checkbox"/> | <input type="checkbox"/>    | <input type="checkbox"/> | <input type="checkbox"/> | <input type="checkbox"/> | <input type="checkbox"/> | <input type="checkbox"/> | <input type="checkbox"/> |                    |
|    | <input type="checkbox"/>                          | <input type="checkbox"/> | <input type="checkbox"/> | <input type="checkbox"/>    | <input type="checkbox"/> | <input type="checkbox"/> | <input type="checkbox"/> | <input type="checkbox"/> | <input type="checkbox"/> | <input type="checkbox"/> |                    |
|    | <input type="checkbox"/>                          | <input type="checkbox"/> | <input type="checkbox"/> | <input type="checkbox"/>    | <input type="checkbox"/> | <input type="checkbox"/> | <input type="checkbox"/> | <input type="checkbox"/> | <input type="checkbox"/> | <input type="checkbox"/> |                    |
|    | <input type="checkbox"/>                          | <input type="checkbox"/> | <input type="checkbox"/> | <input type="checkbox"/>    | <input type="checkbox"/> | <input type="checkbox"/> | <input type="checkbox"/> | <input type="checkbox"/> | <input type="checkbox"/> | <input type="checkbox"/> |                    |
|    | <input type="checkbox"/>                          | <input type="checkbox"/> | <input type="checkbox"/> | <input type="checkbox"/>    | <input type="checkbox"/> | <input type="checkbox"/> | <input type="checkbox"/> | <input type="checkbox"/> | <input type="checkbox"/> | <input type="checkbox"/> |                    |
|    | <input type="checkbox"/>                          | <input type="checkbox"/> | <input type="checkbox"/> | <input type="checkbox"/>    | <input type="checkbox"/> | <input type="checkbox"/> | <input type="checkbox"/> | <input type="checkbox"/> | <input type="checkbox"/> | <input type="checkbox"/> |                    |
|    | <input type="checkbox"/>                          | <input type="checkbox"/> | <input type="checkbox"/> | <input type="checkbox"/>    | <input type="checkbox"/> | <input type="checkbox"/> | <input type="checkbox"/> | <input type="checkbox"/> | <input type="checkbox"/> | <input type="checkbox"/> |                    |
|    | <input type="checkbox"/>                          | <input type="checkbox"/> | <input type="checkbox"/> | <input type="checkbox"/>    | <input type="checkbox"/> | <input type="checkbox"/> | <input type="checkbox"/> | <input type="checkbox"/> | <input type="checkbox"/> | <input type="checkbox"/> |                    |
|    | <input type="checkbox"/>                          | <input type="checkbox"/> | <input type="checkbox"/> | <input type="checkbox"/>    | <input type="checkbox"/> | <input type="checkbox"/> | <input type="checkbox"/> | <input type="checkbox"/> | <input type="checkbox"/> | <input type="checkbox"/> |                    |
|    | <input type="checkbox"/>                          | <input type="checkbox"/> | <input type="checkbox"/> | <input type="checkbox"/>    | <input type="checkbox"/> | <input type="checkbox"/> | <input type="checkbox"/> | <input type="checkbox"/> | <input type="checkbox"/> | <input type="checkbox"/> |                    |
|    | <input type="checkbox"/>                          | <input type="checkbox"/> | <input type="checkbox"/> | <input type="checkbox"/>    | <input type="checkbox"/> | <input type="checkbox"/> | <input type="checkbox"/> | <input type="checkbox"/> | <input type="checkbox"/> | <input type="checkbox"/> |                    |
|    | <input type="checkbox"/>                          | <input type="checkbox"/> | <input type="checkbox"/> | <input type="checkbox"/>    | <input type="checkbox"/> | <input type="checkbox"/> | <input type="checkbox"/> | <input type="checkbox"/> | <input type="checkbox"/> | <input type="checkbox"/> |                    |
|    | <input type="checkbox"/>                          | <input type="checkbox"/> | <input type="checkbox"/> | <input type="checkbox"/>    | <input type="checkbox"/> | <input type="checkbox"/> | <input type="checkbox"/> | <input type="checkbox"/> | <input type="checkbox"/> | <input type="checkbox"/> |                    |
|    | <input type="checkbox"/>                          | <input type="checkbox"/> | <input type="checkbox"/> | <input type="checkbox"/>    | <input type="checkbox"/> | <input type="checkbox"/> | <input type="checkbox"/> | <input type="checkbox"/> | <input type="checkbox"/> | <input type="checkbox"/> |                    |
|    | <input type="checkbox"/>                          | <input type="checkbox"/> | <input type="checkbox"/> | <input type="checkbox"/>    | <input type="checkbox"/> | <input type="checkbox"/> | <input type="checkbox"/> | <input type="checkbox"/> | <input type="checkbox"/> | <input type="checkbox"/> |                    |
|    | <input type="checkbox"/>                          | <input type="checkbox"/> | <input type="checkbox"/> | <input type="checkbox"/>    | <input type="checkbox"/> | <input type="checkbox"/> | <input type="checkbox"/> | <input type="checkbox"/> | <input type="checkbox"/> | <input type="checkbox"/> |                    |
|    | <input type="checkbox"/>                          | <input type="checkbox"/> | <input type="checkbox"/> | <input type="checkbox"/>    | <input type="checkbox"/> | <input type="checkbox"/> | <input type="checkbox"/> | <input type="checkbox"/> | <input type="checkbox"/> | <input type="checkbox"/> |                    |
|    | <input type="checkbox"/>                          | <input type="checkbox"/> | <input type="checkbox"/> | <input type="checkbox"/>    | <input type="checkbox"/> | <input type="checkbox"/> | <input type="checkbox"/> | <input type="checkbox"/> | <input type="checkbox"/> | <input type="checkbox"/> |                    |
|    | <input type="checkbox"/>                          | <input type="checkbox"/> | <input type="checkbox"/> | <input type="checkbox"/>    | <input type="checkbox"/> | <input type="checkbox"/> | <input type="checkbox"/> | <input type="checkbox"/> | <input type="checkbox"/> | <input type="checkbox"/> |                    |
|    | <input type="checkbox"/>                          | <input type="checkbox"/> | <input type="checkbox"/> | <input type="checkbox"/>    | <input type="checkbox"/> | <input type="checkbox"/> | <input type="checkbox"/> | <input type="checkbox"/> | <input type="checkbox"/> | <input type="checkbox"/> |                    |
|    | <input type="checkbox"/>                          | <input type="checkbox"/> | <input type="checkbox"/> | <input type="checkbox"/>    | <input type="checkbox"/> | <input type="checkbox"/> | <input type="checkbox"/> | <input type="checkbox"/> | <input type="checkbox"/> | <input type="checkbox"/> |                    |
|    | <input type="checkbox"/>                          | <input type="checkbox"/> | <input type="checkbox"/> | <input type="checkbox"/>    | <input type="checkbox"/> | <input type="checkbox"/> | <input type="checkbox"/> | <input type="checkbox"/> | <input type="checkbox"/> | <input type="checkbox"/> |                    |
|    | <input type="checkbox"/>                          | <input type="checkbox"/> | <input type="checkbox"/> | <input type="checkbox"/>    | <input type="checkbox"/> | <input type="checkbox"/> | <input type="checkbox"/> | <input type="checkbox"/> | <input type="checkbox"/> | <input type="checkbox"/> |                    |
|    | <input type="checkbox"/>                          | <input type="checkbox"/> | <input type="checkbox"/> | <input type="checkbox"/>    | <input type="checkbox"/> | <input type="checkbox"/> | <input type="checkbox"/> | <input type="checkbox"/> | <input type="checkbox"/> | <input type="checkbox"/> |                    |
|    | <input type="checkbox"/>                          | <input type="checkbox"/> | <input type="checkbox"/> | <input type="checkbox"/>    | <input type="checkbox"/> | <input type="checkbox"/> | <input type="checkbox"/> | <input type="checkbox"/> | <input type="checkbox"/> | <input type="checkbox"/> |                    |
|    | <input type="checkbox"/>                          | <input type="checkbox"/> | <input type="checkbox"/> | <input type="checkbox"/>    | <input type="checkbox"/> | <input type="checkbox"/> | <input type="checkbox"/> | <input type="checkbox"/> | <input type="checkbox"/> | <input type="checkbox"/> |                    |
|    | <input type="checkbox"/>                          | <input type="checkbox"/> | <input type="checkbox"/> | <input type="checkbox"/>    | <input type="checkbox"/> | <input type="checkbox"/> | <input type="checkbox"/> | <input type="checkbox"/> | <input type="checkbox"/> | <input type="checkbox"/> |                    |
|    | <input type="checkbox"/>                          | <input type="checkbox"/> | <input type="checkbox"/> | <input type="checkbox"/>    | <input type="checkbox"/> | <input type="checkbox"/> | <input type="checkbox"/> | <input type="checkbox"/> | <input type="checkbox"/> | <input type="checkbox"/> |                    |
|    | <input type="checkbox"/>                          | <input type="checkbox"/> | <input type="checkbox"/> | <input type="checkbox"/>    | <input type="checkbox"/> | <input type="checkbox"/> | <input type="checkbox"/> | <input type="checkbox"/> | <input type="checkbox"/> | <input type="checkbox"/> |                    |
|    | <input type="checkbox"/>                          | <input type="checkbox"/> | <input type="checkbox"/> | <input type="checkbox"/>    | <input type="checkbox"/> | <input type="checkbox"/> | <input type="checkbox"/> | <input type="checkbox"/> | <input type="checkbox"/> | <input type="checkbox"/> |                    |
|    | <input type="checkbox"/>                          | <input type="checkbox"/> | <input type="checkbox"/> | <input type="checkbox"/>    | <input type="checkbox"/> | <input type="checkbox"/> | <input type="checkbox"/> | <input type="checkbox"/> | <input type="checkbox"/> | <input type="checkbox"/> |                    |
|    | <input type="checkbox"/>                          | <input type="checkbox"/> | <input type="checkbox"/> | <input type="checkbox"/>    | <input type="checkbox"/> | <input type="checkbox"/> | <input type="checkbox"/> | <input type="checkbox"/> | <input type="checkbox"/> | <input type="checkbox"/> |                    |
|    | <input type="checkbox"/>                          | <input type="checkbox"/> | <input type="checkbox"/> | <input type="checkbox"/>    | <input type="checkbox"/> | <input type="checkbox"/> | <input type="checkbox"/> | <input type="checkbox"/> | <input type="checkbox"/> | <input type="checkbox"/> |                    |
|    | <input type="checkbox"/>                          | <input type="checkbox"/> | <input type="checkbox"/> | <input type="checkbox"/>    | <input type="checkbox"/> | <input type="checkbox"/> | <input type="checkbox"/> | <input type="checkbox"/> | <input type="checkbox"/> | <input type="checkbox"/> |                    |
|    | <input type="checkbox"/>                          | <input type="checkbox"/> | <input type="checkbox"/> | <input type="checkbox"/>    | <input type="checkbox"/> | <input type="checkbox"/> | <input type="checkbox"/> | <input type="checkbox"/> | <input type="checkbox"/> | <input type="checkbox"/> |                    |
|    | <input type="checkbox"/>                          | <input type="checkbox"/> | <input type="checkbox"/> | <input type="checkbox"/>    | <input type="checkbox"/> | <input type="checkbox"/> | <input type="checkbox"/> | <input type="checkbox"/> | <input type="checkbox"/> | <input type="checkbox"/> |                    |
|    | <input type="checkbox"/>                          | <input type="checkbox"/> | <input type="checkbox"/> | <input type="checkbox"/>    | <input type="checkbox"/> | <input type="checkbox"/> | <input type="checkbox"/> | <input type="checkbox"/> | <input type="checkbox"/> | <input type="checkbox"/> |                    |
|    | <input type="checkbox"/>                          | <input type="checkbox"/> | <input type="checkbox"/> | <input type="checkbox"/>    | <input type="checkbox"/> | <input type="checkbox"/> | <input type="checkbox"/> | <input type="checkbox"/> | <input type="checkbox"/> | <input type="checkbox"/> |                    |
|    | <input type="checkbox"/>                          | <input type="checkbox"/> | <input type="checkbox"/> | <input type="checkbox"/>    | <input type="checkbox"/> | <input type="checkbox"/> | <input type="checkbox"/> | <input type="checkbox"/> | <input type="checkbox"/> | <input type="checkbox"/> |                    |
|    | <input type="checkbox"/>                          | <input type="checkbox"/> | <input type="checkbox"/> | <input type="checkbox"/>    | <input type="checkbox"/> | <input type="checkbox"/> | <input type="checkbox"/> | <input type="checkbox"/> | <input type="checkbox"/> | <input type="checkbox"/> |                    |
|    | <input type="checkbox"/>                          | <input type="checkbox"/> | <input type="checkbox"/> | <input type="checkbox"/>    | <input type="checkbox"/> | <input type="checkbox"/> | <input type="checkbox"/> | <input type="checkbox"/> | <input type="checkbox"/> | <input type="checkbox"/> |                    |
|    | <input type="checkbox"/>                          | <input type="checkbox"/> | <input type="checkbox"/> | <input type="checkbox"/>    | <input type="checkbox"/> | <input type="checkbox"/> | <input type="checkbox"/> | <input type="checkbox"/> | <input type="checkbox"/> | <input type="checkbox"/> |                    |
|    | <input type="checkbox"/>                          | <input type="checkbox"/> | <input type="checkbox"/> | <input type="checkbox"/>    | <input type="checkbox"/> | <input type="checkbox"/> | <input type="checkbox"/> | <input type="checkbox"/> | <input type="checkbox"/> | <input type="checkbox"/> |                    |
|    | <input type="checkbox"/>                          | <input type="checkbox"/> | <input type="checkbox"/> | <input type="checkbox"/>    | <input type="checkbox"/> | <input type="checkbox"/> | <input type="checkbox"/> | <input type="checkbox"/> | <input type="checkbox"/> | <input type="checkbox"/> |                    |
|    | <input type="checkbox"/>                          | <input type="checkbox"/> | <input type="checkbox"/> | <input type="checkbox"/>    | <input type="checkbox"/> | <input type="checkbox"/> | <input type="checkbox"/> | <input type="checkbox"/> | <input type="checkbox"/> | <input type="checkbox"/> |                    |
|    | <input type="checkbox"/>                          | <input type="checkbox"/> | <input type="checkbox"/> | <input type="checkbox"/>    | <input type="checkbox"/> | <input type="checkbox"/> | <input type="checkbox"/> | <input type="checkbox"/> | <input type="checkbox"/> | <input type="checkbox"/> |                    |
|    | <input type="checkbox"/>                          | <input type="checkbox"/> | <input type="checkbox"/> | <input type="checkbox"/>    | <input type="checkbox"/> | <input type="checkbox"/> | <input type="checkbox"/> | <input type="checkbox"/> | <input type="checkbox"/> | <input type="checkbox"/> |                    |
|    | <input type="checkbox"/>                          | <input type="checkbox"/> | <input type="checkbox"/> | <input type="checkbox"/>    | <input type="checkbox"/> | <input type="checkbox"/> | <input type="checkbox"/> | <input type="checkbox"/> | <input type="checkbox"/> | <input type="checkbox"/> |                    |
|    | <input type="checkbox"/>                          | <input type="checkbox"/> | <input type="checkbox"/> | <input type="checkbox"/>    | <input type="checkbox"/> | <input type="checkbox"/> | <input type="checkbox"/> | <input type="checkbox"/> | <input type="checkbox"/> | <input type="checkbox"/> |                    |
|    | <input type="checkbox"/>                          | <input type="checkbox"/> | <input type="checkbox"/> | <input type="checkbox"/>    | <input type="checkbox"/> | <input type="checkbox"/> | <input type="checkbox"/> | <input type="checkbox"/> | <input type="checkbox"/> | <input type="checkbox"/> |                    |
|    | <input type="checkbox"/>                          | <input type="checkbox"/> | <input type="checkbox"/> | <input type="checkbox"/>    | <input type="checkbox"/> | <input type="checkbox"/> | <input type="checkbox"/> | <input type="checkbox"/> | <input type="checkbox"/> | <input type="checkbox"/> |                    |
|    | <input type="checkbox"/>                          | <input type="checkbox"/> | <input type="checkbox"/> | <input type="checkbox"/>    | <input type="checkbox"/> | <input type="checkbox"/> | <input type="checkbox"/> | <input type="checkbox"/> | <input type="checkbox"/> | <input type="checkbox"/> |                    |
|    | <input type="checkbox"/>                          | <input type="checkbox"/> | <input type="checkbox"/> | <input type="checkbox"/>    | <input type="checkbox"/> | <input type="checkbox"/> | <input type="checkbox"/> | <input type="checkbox"/> | <input type="checkbox"/> | <input type="checkbox"/> |                    |
|    | <input type="checkbox"/>                          | <input type="checkbox"/> | <input type="checkbox"/> | <input type="checkbox"/>    | <input type="checkbox"/> | <input type="checkbox"/> | <input type="checkbox"/> | <input type="checkbox"/> | <input type="checkbox"/> | <input type="checkbox"/> |                    |
|    | <input type="checkbox"/>                          | <input type="checkbox"/> | <input type="checkbox"/> | <input type="checkbox"/>    | <input type="checkbox"/> | <input type="checkbox"/> | <input type="checkbox"/> | <input type="checkbox"/> | <input type="checkbox"/> | <input type="checkbox"/> |                    |
|    | <input type="checkbox"/>                          | <input type="checkbox"/> | <input type="checkbox"/> | <input type="checkbox"/>    | <input type="checkbox"/> | <input type="checkbox"/> | <input type="checkbox"/> | <input type="checkbox"/> | <input type="checkbox"/> | <input type="checkbox"/> |                    |
|    | <input type="checkbox"/>                          | <input type="checkbox"/> | <input type="checkbox"/> | <input type="checkbox"/>    | <input type="checkbox"/> | <input type="checkbox"/> | <input type="checkbox"/> | <input type="checkbox"/> | <input type="checkbox"/> | <input type="checkbox"/> |                    |
|    | <input type="checkbox"/>                          | <input type="checkbox"/> | <input type="checkbox"/> | <input type="checkbox"/>    | <input type="checkbox"/> | <input type="checkbox"/> | <input type="checkbox"/> | <input type="checkbox"/> | <input type="checkbox"/> | <input type="checkbox"/> |                    |
|    | <input type="checkbox"/>                          | <input type="checkbox"/> | <input type="checkbox"/> | <input type="checkbox"/>    | <input type="checkbox"/> | <input type="checkbox"/> | <input type="checkbox"/> | <input type="checkbox"/> | <input type="checkbox"/> | <input type="checkbox"/> |                    |
|    | <input type="checkbox"/>                          | <input type="checkbox"/> | <input type="checkbox"/> | <input type="checkbox"/>    | <input type="checkbox"/> | <input type="checkbox"/> | <input type="checkbox"/> | <input type="checkbox"/> | <input type="checkbox"/> | <input type="checkbox"/> |                    |
|    | <input type="checkbox"/>                          | <input type="checkbox"/> | <input type="checkbox"/> | <input type="checkbox"/>    | <input type="checkbox"/> | <input type="checkbox"/> | <input type="checkbox"/> | <input type="checkbox"/> | <input type="checkbox"/> | <input type="checkbox"/> |                    |
|    | <input type="checkbox"/>                          | <input type="checkbox"/> | <input type="checkbox"/> | <input type="checkbox"/>    | <input type="checkbox"/> | <input type="checkbox"/> | <input type="checkbox"/> | <input type="checkbox"/> | <input type="checkbox"/> | <input type="checkbox"/> |                    |
|    | <input type="checkbox"/>                          | <input type="checkbox"/> | <input type="checkbox"/> | <input type="checkbox"/>    | <input type="checkbox"/> | <input type="checkbox"/> | <input type="checkbox"/> | <input type="checkbox"/> | <input type="checkbox"/> | <input type="checkbox"/> |                    |
|    | <input type="checkbox"/>                          | <input type="checkbox"/> | <input type="checkbox"/> | <input type="checkbox"/>    | <input type="checkbox"/> | <input type="checkbox"/> | <input type="checkbox"/> | <input type="checkbox"/> | <input type="checkbox"/> | <input type="checkbox"/> |                    |
|    | <input type="checkbox"/>                          | <input type="checkbox"/> | <input type="checkbox"/> | <input type="checkbox"/>    | <input type="checkbox"/> | <input type="checkbox"/> | <input type="checkbox"/> | <input type="checkbox"/> | <input type="checkbox"/> | <input type="checkbox"/> |                    |
|    | <input type="checkbox"/>                          | <input type="checkbox"/> | <input type="checkbox"/> | <input type="checkbox"/>    | <input type="checkbox"/> | <input type="checkbox"/> | <input type="checkbox"/> | <input type="checkbox"/> | <input type="checkbox"/> | <input type="checkbox"/> |                    |
|    | <input type="checkbox"/>                          | <input type="checkbox"/> | <input type="checkbox"/> | <input type="checkbox"/>    | <input type="checkbox"/> | <input type="checkbox"/> | <input type="checkbox"/> | <input type="checkbox"/> | <input type="checkbox"/> | <input type="checkbox"/> |                    |
|    | <input type="checkbox"/>                          | <input type="checkbox"/> | <input type="checkbox"/> | <input type="checkbox"/>    | <input type="checkbox"/> | <input type="checkbox"/> | <input type="checkbox"/> | <input type="checkbox"/> | <input type="checkbox"/> | <input type="checkbox"/> |                    |
|    | <input type="checkbox"/>                          | <input type="checkbox"/> | <input type="checkbox"/> | <input type="checkbox"/>    | <input type="checkbox"/> | <input type="checkbox"/> | <input type="checkbox"/> | <input type="checkbox"/> | <input type="checkbox"/> | <input type="checkbox"/> |                    |
|    | <input type="checkbox"/>                          | <input type="checkbox"/> | <input type="checkbox"/> | <input type="checkbox"/>    | <input type="checkbox"/> | <input type="checkbox"/> | <input type="checkbox"/> | <input type="checkbox"/> | <input type="checkbox"/> | <input type="checkbox"/> |                    |
|    | <input type="checkbox"/>                          | <input type="checkbox"/> | <input type="checkbox"/> | <input type="checkbox"/>    | <input type="checkbox"/> | <input type="checkbox"/> | <input type="checkbox"/> | <input type="checkbox"/> | <input type="checkbox"/> | <input type="checkbox"/> |                    |
|    | <input type="checkbox"/>                          | <input type="checkbox"/> | <input type="checkbox"/> | <input type="checkbox"/>    | <input type="checkbox"/> | <input type="checkbox"/> | <input type="checkbox"/> | <input type="checkbox"/> | <input type="checkbox"/> | <input type="checkbox"/> |                    |
|    | <input type="checkbox"/>                          | <input type="checkbox"/> | <input type="checkbox"/> | <input type="checkbox"/>    | <input type="checkbox"/> | <input type="checkbox"/> | <input type="checkbox"/> | <input type="checkbox"/> | <input type="checkbox"/> | <input type="checkbox"/> |                    |
|    | <input type="checkbox"/>                          | <input type="checkbox"/> | <input type="checkbox"/> | <input type="checkbox"/>    | <input type="checkbox"/> | <input type="checkbox"/> | <input type="checkbox"/> | <input type="checkbox"/> | <input type="checkbox"/> | <input type="checkbox"/> |                    |
|    | <input type="checkbox"/>                          | <input type="checkbox"/> | <input type="checkbox"/> | <input type="checkbox"/>    | <input type="checkbox"/> | <input type="checkbox"/> | <input type="checkbox"/> | <input type="checkbox"/> | <input type="checkbox"/> | <input type="checkbox"/> |                    |
|    | <input type="checkbox"/>                          | <input type="checkbox"/> | <input type="checkbox"/> | <input type="checkbox"/>    | <input type="checkbox"/> | <input type="checkbox"/> | <input type="checkbox"/> | <input type="checkbox"/> | <input type="checkbox"/> | <input type="checkbox"/> |                    |
|    | <input type="checkbox"/>                          | <input type="checkbox"/> | <input type="checkbox"/> | <input type="checkbox"/>    | <input type="checkbox"/> | <input type="checkbox"/> | <input type="checkbox"/> | <input type="checkbox"/> | <input type="checkbox"/> | <input type="checkbox"/> |                    |
|    | <input type="checkbox"/>                          | <input type="checkbox"/> | <input type="checkbox"/> | <input type="checkbox"/>    | <input type="checkbox"/> | <input type="checkbox"/> | <input type="checkbox"/> | <input type="checkbox"/> | <input type="checkbox"/> | <input type="checkbox"/> |                    |
|    | <input type="checkbox"/>                          | <input type="checkbox"/> | <input type="checkbox"/> | <input type="checkbox"/>    | <input type="checkbox"/> | <input type="checkbox"/> | <input type="checkbox"/> | <input type="checkbox"/> | <input type="checkbox"/> | <input type="checkbox"/> |                    |
|    | <input type="checkbox"/>                          | <input type="checkbox"/> | <input type="checkbox"/> | <input type="checkbox"/>    | <input type="checkbox"/> | <input type="checkbox"/> | <input type="checkbox"/> | <input type="checkbox"/> | <input type="checkbox"/> | <input type="checkbox"/> |                    |
|    | <input type="checkbox"/>                          | <input type="checkbox"/> | <input type="checkbox"/> | <input type="checkbox"/>    | <input type="checkbox"/> | <input type="checkbox"/> | <input type="checkbox"/> | <input type="checkbox"/> | <input type="checkbox"/> | <input type="checkbox"/> |                    |
|    | <input type="checkbox"/>                          | <input type="checkbox"/> | <input type="checkbox"/> | <input type="checkbox"/>    | <input type="checkbox"/> | <input type="checkbox"/> | <input type="checkbox"/> | <input type="checkbox"/> | <input type="checkbox"/> | <input type="checkbox"/> |                    |
|    | <input type="checkbox"/>                          | <input type="checkbox"/> | <input type="checkbox"/> | <input type="checkbox"/>    | <input type="checkbox"/> | <input type="checkbox"/> | <input type="checkbox"/> | <input type="checkbox"/> | <input type="checkbox"/> | <input type="checkbox"/> |                    |
|    | <input type="checkbox"/>                          | <input type="checkbox"/> | <input type="checkbox"/> | <input type="checkbox"/>    | <input type="checkbox"/> | <input type="checkbox"/> | <input type="checkbox"/> | <input type="checkbox"/> | <input type="checkbox"/> | <input type="checkbox"/> |                    |
|    | <input type="checkbox"/>                          | <input type="checkbox"/> | <input type="checkbox"/> | <input type="checkbox"/>    | <input type="checkbox"/> | <input type="checkbox"/> | <input type="checkbox"/> | <input type="checkbox"/> | <input type="checkbox"/> | <input type="checkbox"/> |                    |
|    | <input type="checkbox"/>                          | <input type="checkbox"/> | <input type="checkbox"/> | <input type="checkbox"/>    | <input type="checkbox"/> | <input type="checkbox"/> | <input type="checkbox"/> | <input type="checkbox"/> | <input type="checkbox"/> | <input type="checkbox"/> |                    |
|    | <input type="checkbox"/>                          | <input type="checkbox"/> | <input type="checkbox"/> | <input type="checkbox"/>    | <input type="checkbox"/> | <input type="checkbox"/> | <input type="checkbox"/> | <input type="checkbox"/> | <input type="checkbox"/> | <input type="checkbox"/> |                    |
|    | <input type="checkbox"/>                          | <input type="checkbox"/> | <input type="checkbox"/> | <input type="checkbox"/>    | <input type="checkbox"/> | <input type="checkbox"/> | <input type="checkbox"/> | <input type="checkbox"/> | <input type="checkbox"/> | <input type="checkbox"/> |                    |
|    | <input type="checkbox"/>                          | <input type="checkbox"/> | <input type="checkbox"/> | <input type="checkbox"/>    | <input type="checkbox"/> | <input type="checkbox"/> | <input type="checkbox"/> | <input type="checkbox"/> | <input type="checkbox"/> | <input type="checkbox"/> |                    |
|    | <input type="checkbox"/>                          | <input type="checkbox"/> | <input type="checkbox"/> | <input type="checkbox"/>    | <input type="checkbox"/> | <input type="checkbox"/> | <input type="checkbox"/> | <input type="checkbox"/> | <input type="checkbox"/> | <input type="checkbox"/> |                    |
|    | <input type="checkbox"/>                          | <input type="checkbox"/> | <input type="checkbox"/> | <input type="checkbox"/>    | <input type="checkbox"/> | <input type="checkbox"/> | <input type="checkbox"/> | <input type="checkbox"/> | <input type="checkbox"/> | <input type="checkbox"/> |                    |
|    | <input type="checkbox"/>                          | <input type="checkbox"/> | <input type="checkbox"/> | <input type="checkbox"/> </ |                          |                          |                          |                          |                          |                          |                    |

For the same regimens recorded on the previous page, please now indicate any issues with the current regimen

| <b>Side effects</b>                            |                          |
|------------------------------------------------|--------------------------|
| 2. Dizziness                                   | <input type="checkbox"/> |
| 3. Hypotension                                 | <input type="checkbox"/> |
| 4. Headaches                                   | <input type="checkbox"/> |
| 5. Confusion / difficulty thinking             | <input type="checkbox"/> |
| 6. Depression                                  | <input type="checkbox"/> |
| 7. Drowsiness / weakness                       | <input type="checkbox"/> |
| 8. Fatigue / Tiredness                         | <input type="checkbox"/> |
| 9. Problems sleeping                           | <input type="checkbox"/> |
| 10. GI problems (e.g. diarrhoea/constipation)  | <input type="checkbox"/> |
| 11. Abdominal pain                             | <input type="checkbox"/> |
| 12. Stomach problems (e.g. nausea/vomiting)    | <input type="checkbox"/> |
| 13. Loss of appetite                           | <input type="checkbox"/> |
| 14. Irregular heartbeat                        | <input type="checkbox"/> |
| 15. Joint pain / Muscles aches                 | <input type="checkbox"/> |
| 16. Numbness / tingling on skin                | <input type="checkbox"/> |
| 17. Swelling of lips, tongue, throat or face   | <input type="checkbox"/> |
| 18. Abnormal taste (metallic / salty)          | <input type="checkbox"/> |
| 19. Rash                                       | <input type="checkbox"/> |
| 20. Cough                                      | <input type="checkbox"/> |
| 21. Blurred vision / Luminous visual phenomena | <input type="checkbox"/> |
| 22. Cool hands and feet                        | <input type="checkbox"/> |
| 23. Increased risk of bleeding                 | <input type="checkbox"/> |
| 24. Gout                                       | <input type="checkbox"/> |
| 25. Sexual dysfunction                         | <input type="checkbox"/> |
| 26. Worsening renal function                   | <input type="checkbox"/> |
| 27. Hyperkalemia                               | <input type="checkbox"/> |



**Section J**

Q4. Thinking about the last treatment decision (initiation, switch, discontinuation) that you made, how much influence did the patient have?

- I made the treatment decision with no discussion
- We discussed all treatment options together, but I made the final decision
- We discussed all treatment options together and the patient made the final decision
- The patient asked me to prescribe a specific therapy which I did

**Section P**

Q1. How many times has this patient been hospitalised (as an inpatient) for any condition in the last 12 months? *(if none, please write 0)* \_\_\_\_\_ times

Q2. How many times has this patient been hospitalised (as an inpatient) for their heart failure in the last 12 months? *(if none, please write 0)* \_\_\_\_\_ times

Q3. Please complete the grid below with details of the patient’s hospital admissions (all cause) in the last 12 months (max of 6)

| Reason for hospitalisation as an inpatient (write in) | Time since hospitalisation | In relation to patients heart failure? | Type of care?            |                          | Procedure /treatment (write in) | Length of stay (nights) | Critical care needed?    |                          |                          |
|-------------------------------------------------------|----------------------------|----------------------------------------|--------------------------|--------------------------|---------------------------------|-------------------------|--------------------------|--------------------------|--------------------------|
|                                                       |                            |                                        | Emergency                | Non-emergency            |                                 |                         | Yes                      | No                       | Don't know               |
| 1. _____                                              | _____ days                 | <input type="checkbox"/>               | <input type="checkbox"/> | <input type="checkbox"/> | _____                           | _____                   | <input type="checkbox"/> | <input type="checkbox"/> | <input type="checkbox"/> |
| 2. _____                                              | _____ days                 | <input type="checkbox"/>               | <input type="checkbox"/> | <input type="checkbox"/> | _____                           | _____                   | <input type="checkbox"/> | <input type="checkbox"/> | <input type="checkbox"/> |
| 3. _____                                              | _____ days                 | <input type="checkbox"/>               | <input type="checkbox"/> | <input type="checkbox"/> | _____                           | _____                   | <input type="checkbox"/> | <input type="checkbox"/> | <input type="checkbox"/> |
| 4. _____                                              | _____ days                 | <input type="checkbox"/>               | <input type="checkbox"/> | <input type="checkbox"/> | _____                           | _____                   | <input type="checkbox"/> | <input type="checkbox"/> | <input type="checkbox"/> |
| 5. _____                                              | _____ days                 | <input type="checkbox"/>               | <input type="checkbox"/> | <input type="checkbox"/> | _____                           | _____                   | <input type="checkbox"/> | <input type="checkbox"/> | <input type="checkbox"/> |
| 6. _____                                              | _____ days                 | <input type="checkbox"/>               | <input type="checkbox"/> | <input type="checkbox"/> | _____                           | _____                   | <input type="checkbox"/> | <input type="checkbox"/> | <input type="checkbox"/> |

Q4a. On how many occasions in the last 12 months has this patient visited the hospital (all cause) as...? *(If none, please write 0)*

An Emergency Room patient: \_\_\_\_\_ times      Outpatient/day visit: \_\_\_\_\_ times

Q4b. On how many occasions in the last 12 months has this patient visited the hospital due to their heart failure as...? *(If none, please write 0)*

An Emergency Room patient: \_\_\_\_\_ times      Outpatient/day visit: \_\_\_\_\_ times

## Section Q

Q1 Which of the conditions on the list below did the patient (a) suffer from before being diagnosed with heart failure and (b) start suffering from after being diagnosed with heart failure?

|                                                 | 1a) Already suffered before diagnosed with heart failure | 1b) Began suffering after being diagnosed with heart failure |
|-------------------------------------------------|----------------------------------------------------------|--------------------------------------------------------------|
| 1. Anxiety                                      | <input type="checkbox"/>                                 | <input type="checkbox"/>                                     |
| 2. Depression                                   | <input type="checkbox"/>                                 | <input type="checkbox"/>                                     |
| 3. Migraines / headaches                        | <input type="checkbox"/>                                 | <input type="checkbox"/>                                     |
| 4. Hypertension                                 | <input type="checkbox"/>                                 | <input type="checkbox"/>                                     |
| 5. Angina                                       | <input type="checkbox"/>                                 | <input type="checkbox"/>                                     |
| 6. Stroke                                       | <input type="checkbox"/>                                 | <input type="checkbox"/>                                     |
| 7. Hyperlipidaemia                              | <input type="checkbox"/>                                 | <input type="checkbox"/>                                     |
| 8. Deep vein thrombosis                         | <input type="checkbox"/>                                 | <input type="checkbox"/>                                     |
| 9. Peripheral Vascular Disease                  | <input type="checkbox"/>                                 | <input type="checkbox"/>                                     |
| 10. Cerebrovascular Disease                     | <input type="checkbox"/>                                 | <input type="checkbox"/>                                     |
| 11. Long term gastrointestinal problems         | <input type="checkbox"/>                                 | <input type="checkbox"/>                                     |
| 12. Myocardial infarction                       | <input type="checkbox"/>                                 | <input type="checkbox"/>                                     |
| 13. Obesity                                     | <input type="checkbox"/>                                 | <input type="checkbox"/>                                     |
| 14. Cardiac cachexia                            | <input type="checkbox"/>                                 | <input type="checkbox"/>                                     |
| 15. Problems sleeping                           | <input type="checkbox"/>                                 | <input type="checkbox"/>                                     |
| 16. Dementia                                    | <input type="checkbox"/>                                 | <input type="checkbox"/>                                     |
| 17. Asthma                                      | <input type="checkbox"/>                                 | <input type="checkbox"/>                                     |
| 18. COPD                                        | <input type="checkbox"/>                                 | <input type="checkbox"/>                                     |
| 19. Connective Tissue Disease                   | <input type="checkbox"/>                                 | <input type="checkbox"/>                                     |
| 20. Peptic Ulcer Disease                        | <input type="checkbox"/>                                 | <input type="checkbox"/>                                     |
| 21. Diabetes type I (uncomplicated)             | <input type="checkbox"/>                                 | <input type="checkbox"/>                                     |
| 22. Diabetes type I (with end-organ damage)     | <input type="checkbox"/>                                 | <input type="checkbox"/>                                     |
| 23. Diabetes type II (uncomplicated)            | <input type="checkbox"/>                                 | <input type="checkbox"/>                                     |
| 24. Diabetes type II (with end-organ damage)    | <input type="checkbox"/>                                 | <input type="checkbox"/>                                     |
| 25. Chronic Kidney Disease (mild)               | <input type="checkbox"/>                                 | <input type="checkbox"/>                                     |
| 26. Chronic Kidney Disease (moderate to severe) | <input type="checkbox"/>                                 | <input type="checkbox"/>                                     |
| 27. Hemiplegia                                  | <input type="checkbox"/>                                 | <input type="checkbox"/>                                     |
| 28. Leukaemia                                   | <input type="checkbox"/>                                 | <input type="checkbox"/>                                     |
| 29. Malignant Lymphoma                          | <input type="checkbox"/>                                 | <input type="checkbox"/>                                     |
| 30. Solid Tumour (metastatic)                   | <input type="checkbox"/>                                 | <input type="checkbox"/>                                     |
| 31. Solid tumour (not metastatic)               | <input type="checkbox"/>                                 | <input type="checkbox"/>                                     |
| 32. Liver Disease (mild)                        | <input type="checkbox"/>                                 | <input type="checkbox"/>                                     |
| 33. Liver Disease (moderate to severe)          | <input type="checkbox"/>                                 | <input type="checkbox"/>                                     |
| 34. AIDS                                        | <input type="checkbox"/>                                 | <input type="checkbox"/>                                     |
| 35. None                                        | <input type="checkbox"/>                                 | <input type="checkbox"/>                                     |
| 36. Other (please specify) _____                | <input type="checkbox"/>                                 | <input type="checkbox"/>                                     |
| 37. Other (please specify) _____                | <input type="checkbox"/>                                 | <input type="checkbox"/>                                     |

## **Patient self-completion form**

### **Section D**

Q5. Thinking about the last decision that your doctor made about your medicine, how much influence did you have?

- The doctor made the decision about my medicine with no discussion
- We discussed all the medicine options together, but my doctor made the final decision
- We discussed all the medicine options together and I made the final decision
- I asked the doctor to prescribe a specific medicine which he /she did

### **Section F**

Q1. Please indicate on the grid below which side effects, if any, you currently suffer from as a result of taking your currently prescribed heart failure medicine(s)

|                                                 | a) Side effects currently suffered<br>(please ✓ all that apply) |
|-------------------------------------------------|-----------------------------------------------------------------|
| 1. I am not suffering from any side effects     | <input type="checkbox"/>                                        |
| 2. Dizziness                                    | <input type="checkbox"/>                                        |
| 3. Low blood pressure                           | <input type="checkbox"/>                                        |
| 4. Headaches                                    | <input type="checkbox"/>                                        |
| 5. Confusion / difficulty thinking              | <input type="checkbox"/>                                        |
| 6. Depression                                   | <input type="checkbox"/>                                        |
| 7. Drowsiness / weakness                        | <input type="checkbox"/>                                        |
| 8. Fatigue / tiredness                          | <input type="checkbox"/>                                        |
| 9. Problems sleeping                            | <input type="checkbox"/>                                        |
| 10. GI problems (e.g. diarrhoea / constipation) | <input type="checkbox"/>                                        |
| 11. Abdominal pain                              | <input type="checkbox"/>                                        |
| 12. Stomach problems (e.g.) Nausea / vomiting   | <input type="checkbox"/>                                        |
| 13. Loss of appetite                            | <input type="checkbox"/>                                        |
| 14. Irregular heartbeat                         | <input type="checkbox"/>                                        |
| 15. Joint pain / muscle aches                   | <input type="checkbox"/>                                        |
| 16. Numbness or tingling on skin                | <input type="checkbox"/>                                        |
| 17. Swelling of lips, tongue, throat or face    | <input type="checkbox"/>                                        |
| 18. Abnormal taste (metallic or salty taste)    | <input type="checkbox"/>                                        |
| 19. Rash                                        | <input type="checkbox"/>                                        |
| 20. Coughing                                    | <input type="checkbox"/>                                        |
| 21. Blurred vision / vision problems            | <input type="checkbox"/>                                        |
| 22. Cool hands and feet                         | <input type="checkbox"/>                                        |
| 23. Bleed / bruise easily                       | <input type="checkbox"/>                                        |
| 24. Gout                                        | <input type="checkbox"/>                                        |
| 25. Sexual dysfunction                          | <input type="checkbox"/>                                        |
| 26. Other _____                                 | <input type="checkbox"/>                                        |

## **Physician Interview**

### **Front page**

Type of Practice

- Hospital Only     Office / Clinic only     Hospital and office/clinic     Other

If stated hospital specify tier

- Tier 3 hospital  
 Tier 2 hospital  
 Tier 1 hospital  
 CHC

In which province or autonomous region are you based? \_\_\_\_\_
